# Supplementary material for: How Chain Intermixing Dictates the Polymorphism of PVDF in Poly(vinylidene fluoride)/Polymethylmethacrylate Binary System during Recrystallization: A Comparative Study on Core–Shell Particles and Latex Blend
Source: MDPI journal article supplement (doi:10.3390/polym9090448), 2017-09-14
Supplement: s1 [file s1]

# How Chain Intermixing Dictates the Polymorphism of PVDF in Poly(vinylidene fluoride)/Polymethylmethacrylate Binary System during Recrystallization: A Comparative Study on Core/Shell Particles and Latex Blend

Yue Li <sup>1,2</sup>, Guoqiang Zhang <sup>3</sup>, Shaofeng Song <sup>1</sup>, Haijun Xu <sup>1</sup>, Mingwang Pan <sup>1,\*</sup> and Gan-Ji Zhong <sup>2,\*</sup>

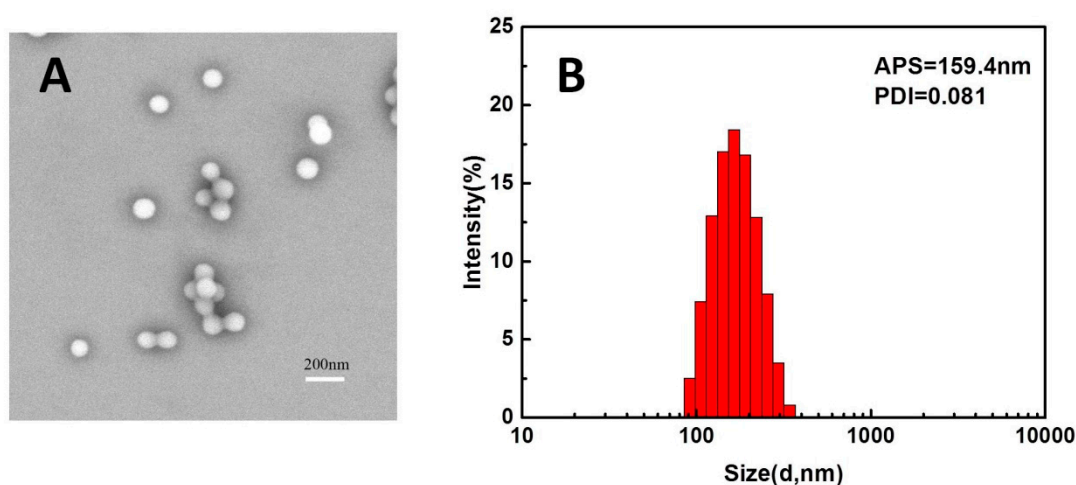

Figure S1 (A) SEM image and (B) size distribution of PMMA latex particles.

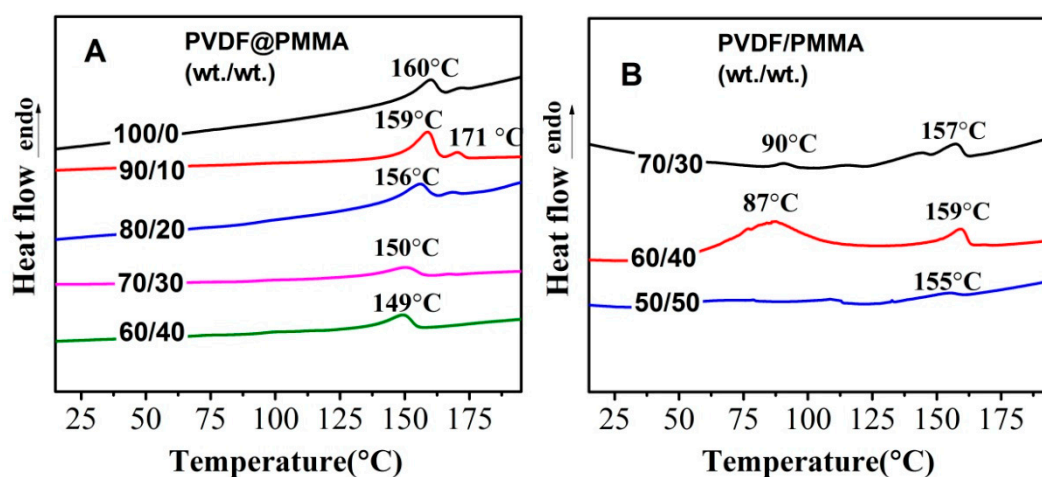

Figure S2. DSC first heating curves of (A) PVDF@PMMA, (B) PVDF/PMMA at various weight ratios of PVDF to PMMA. The cooling rate was  $-10\text{ }^{\circ}\text{C}/\text{min}$ .

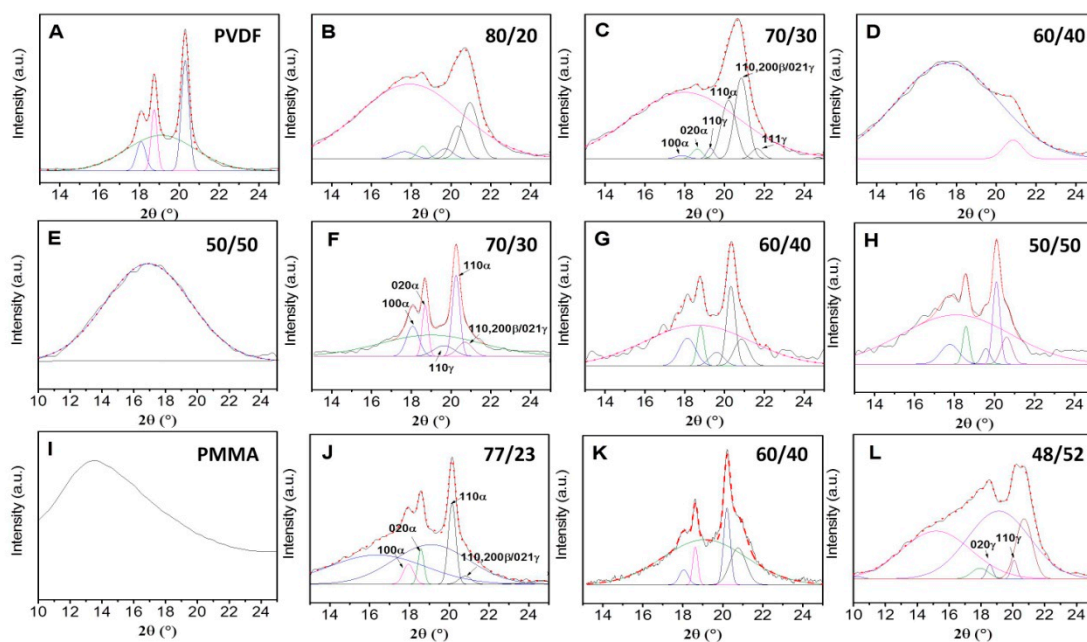

**Figure S3.** Deconvolution of the X-ray diffraction curves for (A) neat PVDF, (I) neat PMMA and three series of samples: (B–E) PVDF@PMMA, (F–H) PVDF/PMMA, (J–L) PVDF@c-PMMA.
